# Supplementary material for: Global-scale analysis of the effect of gas-phase Criegee intermediates (CIs) on sulphate aerosol formation: general trend and the importance of hydroxy radicals decomposed from vibrationally excited CIs
Source: Royal Society of Chemistry journal article supplement (doi:10.1039/d4ea00137k), 2025-01-01
Supplement: d4ea00137k1.pdf [file d4ea00137k1.pdf]

*Supplementary Information*

**Global-scale analysis of the effect of gas-phase Criegee intermediates (CIs) to the sulphate aerosol formation: General trend and the importance of hydroxy radical decomposed from vibrationally-excited CIs**

Hiroo Hata<sup>a,\*</sup>, Yuya Nakamura<sup>b</sup>, Jairo Vazquez Santiago<sup>a</sup>, and Kenichi Tonokura<sup>c</sup>

*a. Research Institute of Science for Safety and Sustainability, National Institute of Advanced Industrial Science and Technology (AIST), 16-1 Onogawa, Tsukuba, Ibaraki 305-8569, Japan*

*b. Department of Global Agricultural Sciences, Graduate School of Agricultural and Life Sciences, The University of Tokyo 1-1-1, Yayoi, Bunkyo-ku, Tokyo 113-8657, Japan.*

*c. Graduate School of Frontier Sciences, University of Tokyo, Kashiwanoha, Kashiwa, Chiba 277-8563, Japan*

\*Corresponding author. E-mail: [hata-hiroo@aist.go.jp](mailto:hata-hiroo@aist.go.jp); Tel: +81-29-861-8413

## Text S1 □ Additional information of “Methodology” section

Table S1: Latitudes and longitudes of the five sites analysed in this study

| Site | Country      | City         | Latitude | Longitude |
|------|--------------|--------------|----------|-----------|
| CHI  | China        | Wuhan        | 30.6     | 114.3     |
| IND  | India        | Raipur       | 21.3     | 81.6      |
| ZAF  | South Africa | Johannesburg | -26.2    | 28.0      |
| AUS  | Australia    | Sydney       | -33.9    | 151.2     |
| BOL  | Bolivia      | Riberalta    | -10.8    | -66.1     |

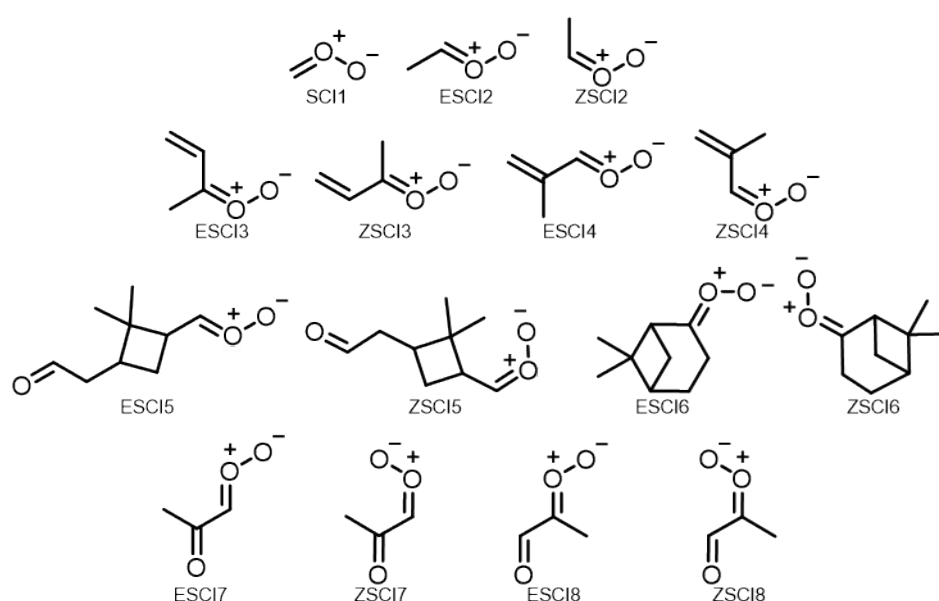

Figure S1: Detailed structures of the Stabilised Criegee intermediates (sCIs) considered in this study

Table S2: Kinetic parameters of the unimolecular reactions of Stabilised Criegee intermediates (sCIs). The kinetic expression is defined by the modified Arrhenius equation [ $k = A(T/300)^B \exp(-E_a/T)$ ], where  $k$  is the rate constant ( $s^{-1}$ ) and  $T$  is the temperature (K). RCHO is an aldehyde with more than C3-chain.

| sCIs  | Type   | Products                     | $A$ ( $s^{-1}$ )       | $B$   | $E_a$ (K) |
|-------|--------|------------------------------|------------------------|-------|-----------|
| SCI1  | 13ring | HCOOH                        | $1.345 \times 10^{11}$ | 4.00  | 8024      |
| ESCI2 | 13ring | ACTA                         | $3.733 \times 10^{12}$ | 1.35  | 7445      |
| ZSCI2 | 14Hmig | CO + 2OH + CH <sub>2</sub> O | $2.635 \times 10^{-2}$ | 25.00 | -2685     |
|       | 13ring | ACTA                         | $4.360 \times 10^{11}$ | 2.98  | 10755     |
| ESCI3 | 13ring | MEK                          | $5.517 \times 10^{12}$ | 0.48  | 10385     |

|       |        |           |                        |       |       |
|-------|--------|-----------|------------------------|-------|-------|
|       | 14Hmig | MVK + OH  | $6.265 \times 10^{-3}$ | 25.90 | -2737 |
| ZSCI3 | 15ring | RCHO      | $1.198 \times 10^{12}$ | 0.65  | 5617  |
|       | 13ring | MEK       | $2.076 \times 10^{12}$ | 1.12  | 8291  |
| ESCI4 | 13ring | RCOOH     | $2.453 \times 10^{12}$ | 1.46  | 7832  |
| ZSCI4 | 15ring | RCHO      | $1.956 \times 10^{12}$ | 0.44  | 6102  |
|       | 13ring | RCOOH     | $8.008 \times 10^{11}$ | 1.68  | 8476  |
| ESCI5 | 13ring | MEK       | $4.036 \times 10^{11}$ | 2.43  | 6732  |
| ZSCI5 | 14Hmig | MEK + OH  | $6.373 \times 10^{-1}$ | 23.00 | -2099 |
|       | 13ring | MEK       | $2.802 \times 10^{11}$ | 3.45  | 9906  |
| ESCI6 | 13ring | MEK       | $2.295 \times 10^{12}$ | 1.23  | 10358 |
|       | 14Hmig | MEK + OH  | $2.358 \times 10^{-1}$ | 23.27 | -2251 |
| ZSCI6 | 13ring | MEK       | $3.744 \times 10^{12}$ | 1.33  | 8425  |
| ESCI7 | 13ring | RCOOH     | $1.176 \times 10^{12}$ | 2.30  | 9127  |
| ZSCI7 | 13ring | RCOOH     | $5.178 \times 10^{11}$ | 2.41  | 7141  |
| ESCI8 | 14Hmig | RCHO + OH | $2.375 \times 10^{-5}$ | 30.08 | -3644 |
|       | 13ring | RCHO      | $1.439 \times 10^{12}$ | 2.34  | 12328 |
| ZSCI8 | 13ring | RCHO      | $2.361 \times 10^{12}$ | 0.78  | 5162  |

Table S3: Kinetic parameters for the reactions of Stabilised Criegee intermediates (sCIs) with H<sub>2</sub>O. The kinetic expression is defined by the modified Arrhenius equation [ $k = A(T/300)^B \exp(-E_a/T)$ ], where  $k$  is the rate constant (cm<sup>3</sup> molec.<sup>-1</sup> s<sup>-1</sup>) and  $T$  is the temperature (K). HMHP, hydroxymethyl hydroperoxide; PP, propyl peroxide; MVKHP, hydroxyhydroperoxide derived from MVK; MACR1OOH, hydroxy hydroperoxide derived from MACR; GLYX, glyoxal.

| SCIs  | Products                                    | $A$ (cm <sup>3</sup> molec. <sup>-1</sup> s <sup>-1</sup> ) | $B$  | $E_a$ (K) |
|-------|---------------------------------------------|-------------------------------------------------------------|------|-----------|
| SCI1  | 0.4CH <sub>2</sub> O + 0.55HMHP + 0.05HCOOH | $9.056 \times 10^{-15}$                                     | 1.23 | 698       |
| ESCI2 | 0.4ALD <sub>2</sub> + 0.55PP + 0.05ACTA     | $6.045 \times 10^{-15}$                                     | 1.27 | -405      |
| ZSCI2 | 0.4ALD <sub>2</sub> + 0.55PP + 0.05ACTA     | $3.177 \times 10^{-15}$                                     | 1.68 | 2513      |
| ESCI3 | 0.4MVK + 0.55MVKHP                          | $2.924 \times 10^{-15}$                                     | 1.46 | 3132      |
| ZSCI3 | 0.4MVK + 0.55MVKHP                          | $9.278 \times 10^{-16}$                                     | 2.27 | 1858      |
| ESCI4 | 0.4MACR + 0.55MACR1OOH + 0.05RCOOH          | $4.351 \times 10^{-15}$                                     | 1.74 | 929       |
| ZSCI4 | 0.4MACR + 0.55MACR1OOH + 0.05RCOOH          | $3.425 \times 10^{-15}$                                     | 1.52 | 2977      |
| ESCI5 | 0.4MEK + 0.55PP                             | $1.295 \times 10^{-14}$                                     | 0.17 | -71       |
| ZSCI5 | 0.4MEK + 0.55PP                             | $5.283 \times 10^{-17}$                                     | 3.83 | 1023      |
| ESCI6 | 0.4MEK + 0.55PP                             | $3.030 \times 10^{-16}$                                     | 2.37 | 1525      |
| ZSCI6 | 0.4MEK + 0.55PP                             | $2.931 \times 10^{-16}$                                     | 2.64 | -121      |

|       |                              |                         |      |      |
|-------|------------------------------|-------------------------|------|------|
| ESCI7 | 0.4GLYX + 0.55PP + 0.05RCOOH | $9.804 \times 10^{-15}$ | 1.53 | 2258 |
| ZSCI7 | 0.4GLYX + 0.55PP + 0.05RCOOH | $2.435 \times 10^{-15}$ | 1.03 | -131 |
| ESCI8 | 0.45MGLY + 0.55PP            | $4.674 \times 10^{-15}$ | 1.87 | 4177 |
| ZSCI8 | 0.45MGLY + 0.55PP            | $1.133 \times 10^{-15}$ | 1.68 | -757 |

Table S4: Kinetic parameters of the reactions of Stabilised Criegee intermediates (sCIs) with  $(\text{H}_2\text{O})_2$ . The kinetic expression is defined as  $k = A(T/300)^B$ , where  $k$  is the rate constant ( $\text{cm}^3 \text{ molec.}^{-1} \text{ s}^{-1}$ ) and  $T$  is the temperature (K). The products are assumed to be the same as those used in the reactions of the sCIs with  $\text{H}_2\text{O}$ , according to Nakamura et al.

| SCIs  | Products                                    | $A$ ( $\text{cm}^3 \text{ molec.}^{-1} \text{ s}^{-1}$ ) | $B$   |
|-------|---------------------------------------------|----------------------------------------------------------|-------|
| SCI1  | 0.4CH <sub>2</sub> O + 0.55HMHP + 0.05HCOOH | $2.900 \times 10^{-33}$                                  | -11.1 |
| ESCI2 | 0.4ALD2 + 0.55PP + 0.05ACTA                 | $4.964 \times 10^{-32}$                                  | -14.7 |
| ZSCI2 | 0.4ALD2 + 0.55PP + 0.05ACTA                 | $4.209 \times 10^{-36}$                                  | -4.82 |
| ESCI3 | 0.4MVK + 0.55MVKHP                          | $6.525 \times 10^{-37}$                                  | -3.1  |
| ZSCI3 | 0.4MVK + 0.55MVKHP                          | $9.914 \times 10^{-36}$                                  | -6.38 |
| ESCI4 | 0.4MACR + 0.55MACR1OOH + 0.05RCOOH          | $6.927 \times 10^{-34}$                                  | -9.88 |
| ZSCI4 | 0.4MACR + 0.55MACR1OOH + 0.05RCOOH          | $1.172 \times 10^{-36}$                                  | -3.51 |
| ESCI5 | 0.4MEK + 0.55PP                             | $3.308 \times 10^{-32}$                                  | -14.5 |
| ZSCI5 | 0.4MEK + 0.55PP                             | $7.396 \times 10^{-36}$                                  | -7.55 |
| ESCI6 | 0.4MEK + 0.55PP                             | $7.385 \times 10^{-36}$                                  | -7.23 |
| ZSCI6 | 0.4MEK + 0.55PP                             | $1.145 \times 10^{-33}$                                  | -12.5 |
| ESCI7 | 0.4GLYX + 0.55PP + 0.05RCOOH                | $2.718 \times 10^{-35}$                                  | -5.74 |
| ZSCI7 | 0.4GLYX + 0.55PP + 0.05RCOOH                | $8.339 \times 10^{-33}$                                  | -14   |
| ESCI8 | 0.45MGLY + 0.55PP                           | $4.273 \times 10^{-38}$                                  | 0.58  |
| ZSCI8 | 0.45MGLY + 0.55PP                           | $2.702 \times 10^{-32}$                                  | -15.5 |

Table S5: Kinetic parameters for the reactions of Stabilised Criegee intermediates (sCIs) with  $\text{SO}_2$ .  $k$ , rate constant;  $\text{SO}_4$ , sulphate in the gas phase.

| SCIs  | Products                            | $k$ ( $\text{cm}^3 \text{ molec.}^{-1} \text{ s}^{-1}$ ) |
|-------|-------------------------------------|----------------------------------------------------------|
| SCI1  | CH <sub>2</sub> O + SO <sub>4</sub> | $3.700 \times 10^{-11}$                                  |
| ESCI2 | ALD2 + SO <sub>4</sub>              | $1.400 \times 10^{-10}$                                  |
| ZSCI2 | ALD2 + SO <sub>4</sub>              | $2.700 \times 10^{-11}$                                  |
| ESCI3 | MVK + SO <sub>4</sub>               | $1.400 \times 10^{-10}$                                  |
| ZSCI3 | MVK + SO <sub>4</sub>               | $2.700 \times 10^{-11}$                                  |
| ESCI4 | MACR + SO <sub>4</sub>              | $1.400 \times 10^{-10}$                                  |
| ZSCI4 | MACR + SO <sub>4</sub>              | $2.700 \times 10^{-11}$                                  |

|       |            |                         |
|-------|------------|-------------------------|
| ESCI5 | MEK + SO4  | $1.400 \times 10^{-10}$ |
| ZSCI5 | MEK + SO4  | $2.700 \times 10^{-11}$ |
| ESCI6 | MEK + SO4  | $1.400 \times 10^{-10}$ |
| ZSCI6 | MEK + SO4  | $2.700 \times 10^{-11}$ |
| ESCI7 | GLYX + SO4 | $1.400 \times 10^{-10}$ |
| ZSCI7 | GLYX + SO4 | $2.700 \times 10^{-11}$ |
| ESCI8 | MGLY + SO4 | $1.400 \times 10^{-10}$ |
| ZSCI8 | MGLY + SO4 | $2.700 \times 10^{-11}$ |

Table S6: Kinetic parameters of the reactions of Stabilised Criegee intermediates (sCIs) with  $\text{NO}_2$ .  $k$ , rate constant;  $\text{NO}_3$ , nitrate in the gas phase; ALD2, acetaldehyde.

| SCIs  | Products             | $k$ ( $\text{cm}^3 \text{ molec.}^{-1} \text{ s}^{-1}$ ) |
|-------|----------------------|----------------------------------------------------------|
| SCI1  | 0.300CH2O + 0.300NO3 | $4.000 \times 10^{-12}$                                  |
| ESCI2 | 0.300ALD2 + 0.300NO3 | $4.000 \times 10^{-12}$                                  |
| ZSCI2 | 0.300ALD2 + 0.300NO3 | $4.000 \times 10^{-12}$                                  |
| ESCI3 | 0.300MVK + 0.300NO3  | $4.000 \times 10^{-12}$                                  |
| ZSCI3 | 0.300MVK + 0.300NO3  | $4.000 \times 10^{-12}$                                  |
| ESCI4 | 0.300MACR + 0.300NO3 | $4.000 \times 10^{-12}$                                  |
| ZSCI4 | 0.300MACR + 0.300NO3 | $4.000 \times 10^{-12}$                                  |
| ESCI5 | 0.300MEK + 0.300NO3  | $4.000 \times 10^{-12}$                                  |
| ZSCI5 | 0.300MEK + 0.300NO3  | $4.000 \times 10^{-12}$                                  |
| ESCI6 | 0.300MEK + 0.300NO3  | $4.000 \times 10^{-12}$                                  |
| ZSCI6 | 0.300MEK + 0.300NO3  | $4.000 \times 10^{-12}$                                  |
| ESCI7 | 0.300GLYX + 0.300NO3 | $4.000 \times 10^{-12}$                                  |
| ZSCI7 | 0.300GLYX + 0.300NO3 | $4.000 \times 10^{-12}$                                  |
| ESCI8 | 0.300MGLY + 0.300NO3 | $4.000 \times 10^{-12}$                                  |
| ZSCI8 | 0.300MGLY + 0.300NO3 | $4.000 \times 10^{-12}$                                  |

Table S7: Kinetic parameters for the reactions of Stabilised Criegee intermediates (sCIs) with  $\text{HNO}_3$ .  $k$  is a rate constant.

| SCIs  | Products | $k$ ( $\text{cm}^3 \text{ molec.}^{-1} \text{ s}^{-1}$ ) |
|-------|----------|----------------------------------------------------------|
| SCI1  | 0.21OH   | $5.400 \times 10^{-10}$                                  |
| ESCI2 | 0.21OH   | $5.400 \times 10^{-10}$                                  |
| ZSCI2 | 0.21OH   | $5.400 \times 10^{-10}$                                  |
| ESCI3 | 0.21OH   | $5.400 \times 10^{-10}$                                  |
| ZSCI3 | 0.21OH   | $5.400 \times 10^{-10}$                                  |

|       |        |                         |
|-------|--------|-------------------------|
| ESCI4 | 0.21OH | $5.400 \times 10^{-10}$ |
| ZSCI4 | 0.21OH | $5.400 \times 10^{-10}$ |
| ESCI5 | 0.21OH | $5.400 \times 10^{-10}$ |
| ZSCI5 | 0.21OH | $5.400 \times 10^{-10}$ |
| ESCI6 | 0.21OH | $5.400 \times 10^{-10}$ |
| ZSCI6 | 0.21OH | $5.400 \times 10^{-10}$ |
| ESCI7 | 0.21OH | $5.400 \times 10^{-10}$ |
| ZSCI7 | 0.21OH | $5.400 \times 10^{-10}$ |
| ESCI8 | 0.21OH | $5.400 \times 10^{-10}$ |
| ZSCI8 | 0.21OH | $5.400 \times 10^{-10}$ |

Table S8: Kinetic parameters for the reactions of Stabilised Criegee intermediates (sCIs) with HCOOH.  $k$ , rate constant; ATOOH, acetone-derived peroxides.

| SCIs  | Products                                 | $k$ ( $\text{cm}^3 \text{ molec.}^{-1} \text{ s}^{-1}$ ) |
|-------|------------------------------------------|----------------------------------------------------------|
| SCI1  | ATOOH                                    | $1.200 \times 10^{-10}$                                  |
| ESCI2 | ATOOH                                    | $3.800 \times 10^{-10}$                                  |
| ZSCI2 | CO + 2.000OH + CH <sub>2</sub> O + HCOOH | $2.100 \times 10^{-10}$                                  |
| ESCI3 | MVK + OH + HCOOH                         | $3.800 \times 10^{-10}$                                  |
| ZSCI3 | ATOOH                                    | $2.100 \times 10^{-10}$                                  |
| ESCI4 | ATOOH                                    | $3.800 \times 10^{-10}$                                  |
| ZSCI4 | ATOOH                                    | $2.100 \times 10^{-10}$                                  |
| ESCI5 | MEK + HCOOH                              | $3.800 \times 10^{-10}$                                  |
| ZSCI5 | MEK + OH + HCOOH                         | $2.100 \times 10^{-10}$                                  |
| ESCI6 | MEK + OH + HCOOH                         | $3.800 \times 10^{-10}$                                  |
| ZSCI6 | MEK                                      | $2.100 \times 10^{-10}$                                  |
| ESCI7 | ATOOH                                    | $3.800 \times 10^{-10}$                                  |
| ZSCI7 | ATOOH                                    | $2.100 \times 10^{-10}$                                  |
| ESCI8 | RCHO                                     | $3.800 \times 10^{-10}$                                  |
| ZSCI8 | ATOOH                                    | $2.100 \times 10^{-10}$                                  |

Table S9: Kinetic parameters for the reactions of Stabilised Criegee intermediates (sCIs) with CH<sub>3</sub>COOH.  $k$  is a rate constant for which the value of the rate constants was assumed to be the same as that of the reactions of sCIs with HCOOH, according to Nakamura et al.

| SCIs  | Products | $k$ ( $\text{cm}^3 \text{ molec.}^{-1} \text{ s}^{-1}$ ) |
|-------|----------|----------------------------------------------------------|
| SCI1  | ATOOH    | $1.200 \times 10^{-10}$                                  |
| ESCI2 | ATOOH    | $3.800 \times 10^{-10}$                                  |

|       |                  |                         |
|-------|------------------|-------------------------|
| ZSCI2 | ACET + OH + ACTA | $2.100 \times 10^{-10}$ |
| ESCI3 | MVK + OH + ACTA  | $3.800 \times 10^{-10}$ |
| ZSCI3 | ATOOH            | $2.100 \times 10^{-10}$ |
| ESCI4 | ATOOH            | $3.800 \times 10^{-10}$ |
| ZSCI4 | ATOOH            | $2.100 \times 10^{-10}$ |
| ESCI5 | MEK + ACTA       | $3.800 \times 10^{-10}$ |
| ZSCI5 | MEK + OH + ACTA  | $2.100 \times 10^{-10}$ |
| ESCI6 | MEK + OH + ACTA  | $3.800 \times 10^{-10}$ |
| ZSCI6 | MEK + ACTA       | $2.100 \times 10^{-10}$ |
| ESCI7 | ATOOH            | $3.800 \times 10^{-10}$ |
| ZSCI7 | ATOOH            | $2.100 \times 10^{-10}$ |
| ESCI8 | RCHO + ACTA      | $3.800 \times 10^{-10}$ |
| ZSCI8 | ATOOH            | $3.800 \times 10^{-10}$ |

Table S10: Kinetic parameters for the reactions of Stabilised Criegee intermediates (sCIs) with RCOOH.  $k$  is a rate constant for which the value of the rate constants was assumed to be the same as that of the reactions of sCIs with HCOOH and CH<sub>3</sub>COOH, according to Nakamura et al.

| SCIs  | Products          | $k$ (cm <sup>3</sup> molec. <sup>-1</sup> s <sup>-1</sup> ) |
|-------|-------------------|-------------------------------------------------------------|
| SCI1  | ATOOH             | $1.200 \times 10^{-10}$                                     |
| ESCI2 | ATOOH             | $3.800 \times 10^{-10}$                                     |
| ZSCI2 | ACET + OH + RCOOH | $2.100 \times 10^{-10}$                                     |
| ESCI3 | MVK + OH + RCOOH  | $3.800 \times 10^{-10}$                                     |
| ZSCI3 | ATOOH             | $2.100 \times 10^{-10}$                                     |
| ESCI4 | ATOOH             | $3.800 \times 10^{-10}$                                     |
| ZSCI4 | ATOOH             | $2.100 \times 10^{-10}$                                     |
| ESCI5 | MEK + RCOOH       | $3.800 \times 10^{-10}$                                     |
| ZSCI5 | MEK + OH + RCOOH  | $2.100 \times 10^{-10}$                                     |
| ESCI6 | MEK + OH + RCOOH  | $3.800 \times 10^{-10}$                                     |
| ZSCI6 | MEK + RCOOH       | $2.100 \times 10^{-10}$                                     |
| ESCI7 | ATOOH             | $3.800 \times 10^{-10}$                                     |
| ZSCI7 | ATOOH             | $2.100 \times 10^{-10}$                                     |
| ESCI8 | RCHO + RCOOH      | $3.800 \times 10^{-10}$                                     |
| ZSCI8 | ATOOH             | $3.800 \times 10^{-10}$                                     |

Table S11: Alkene ozonolysis reactions in this study

| Alkenes                                   | Products from alkene ozonolysis                                                                                                                                                                                                                               |
|-------------------------------------------|---------------------------------------------------------------------------------------------------------------------------------------------------------------------------------------------------------------------------------------------------------------|
| Ethylene (C <sub>2</sub> H <sub>4</sub> ) | CH <sub>2</sub> O + 0.370SCI <sub>1</sub> + 0.130HO <sub>2</sub> + 0.130OH + 0.630CO                                                                                                                                                                          |
| Propene (PRPE)                            | 0.500ACET + 0.500CH <sub>2</sub> O + 0.120SCI <sub>1</sub> + 0.060ESCI <sub>2</sub><br>+ 0.060ZSCI <sub>2</sub> + 0.820HO <sub>2</sub> + 0.360OH + 0.560CO + 0.280MO <sub>2</sub>                                                                             |
| Methyl Vinyl Ketone (MVK)                 | 0.600CH <sub>2</sub> O + 0.120SCI <sub>1</sub> + 0.060ESCI <sub>7</sub> + 0.060ZSCI <sub>7</sub><br>+ 0.780HO <sub>2</sub> + 0.360OH + 1.060CO + 0.780MCO <sub>3</sub> + 0.100HO <sub>2</sub><br>+ 0.100PYAC                                                  |
| Methacrolein (MACR)                       | 0.500CH <sub>2</sub> O + 0.090SCI <sub>1</sub> + 0.045ESCI <sub>8</sub> + 0.045ZSCI <sub>8</sub><br>+ 0.910HO <sub>2</sub> + 0.820OH + 1.320CO + 0.910MCO <sub>3</sub>                                                                                        |
| Isoprene (ISOP)                           | 0.300MACR + 0.200MVK + 0.110SCI <sub>1</sub> + 0.022ESCI <sub>3</sub> +<br>0.022ZSCI <sub>3</sub> + 0.033ESCI <sub>4</sub> + 0.033ZSCI <sub>4</sub> + 0.271HO <sub>2</sub> + 0.270OH<br>+ 0.522CO + 0.709CH <sub>2</sub> O + 0.105MO <sub>2</sub> + 0.128PRPE |
| Pinene (MTPA)                             | 0.100ESCI <sub>5</sub> + 0.100ZSCI <sub>5</sub> + 0.800OH + 0.200CO<br>+ 0.800KO <sub>2</sub> + 0.30CH <sub>2</sub> O + 0.074SCI <sub>1</sub><br>+ 0.028ESCI <sub>6</sub> + 0.028ZSCI <sub>6</sub> + 0.026HO <sub>2</sub>                                     |
| Other monoterpenes (MTPO)                 | 0.050ESCI <sub>5</sub> + 0.050ZSCI <sub>5</sub> + 0.576OH + 0.226CO + 0.700KO <sub>2</sub> +<br>0.30CH <sub>2</sub> O + 0.074SCI <sub>1</sub> + 0.028ESCI <sub>6</sub> + 0.028ZSCI <sub>6</sub> +<br>0.026HO <sub>2</sub>                                     |
| Limonene (LIMO)                           | 0.050ESCI <sub>5</sub> + 0.050ZSCI <sub>5</sub> + 0.576OH + 0.226CO + 0.700KO <sub>2</sub> +<br>0.30CH <sub>2</sub> O + 0.074SCI <sub>1</sub> + 0.028ESCI <sub>6</sub> + 0.028ZSCI <sub>6</sub> +<br>0.026HO <sub>2</sub>                                     |



Text S2 □ *Additional information of “Results and Discussion” section*

(a) O<sub>3</sub>

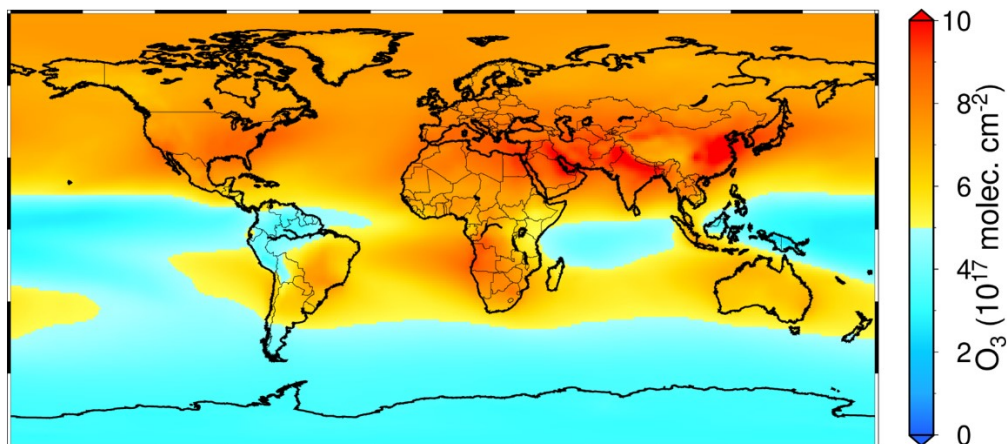

(b) SO<sub>2</sub>

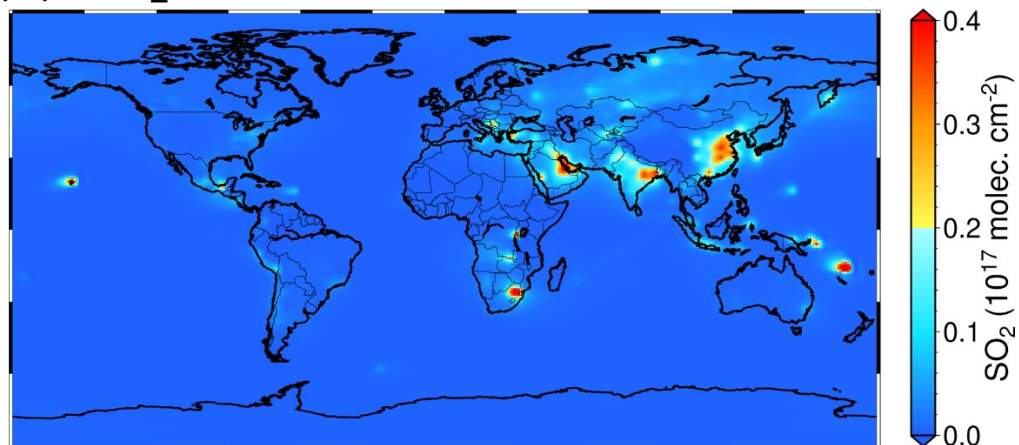

(c) Total alkenes

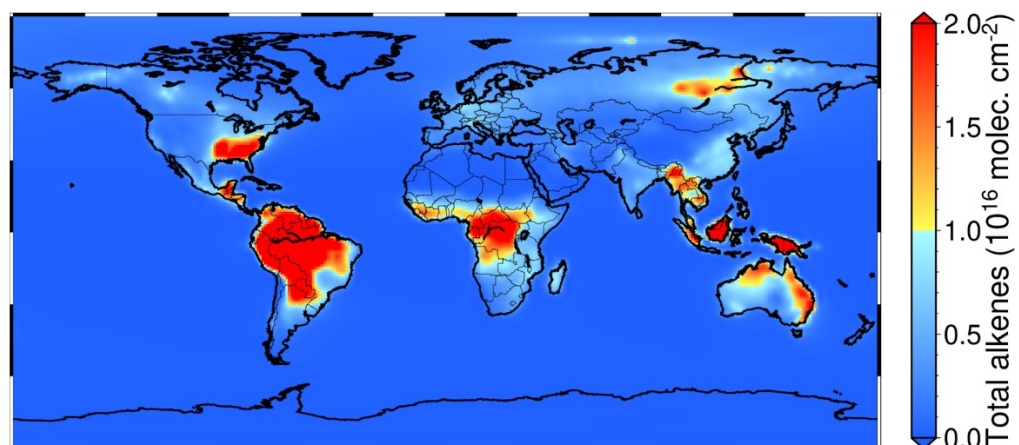

Figure S2: Annual mean column densities of (a) O<sub>3</sub>, (b) SO<sub>2</sub>, and (c) total alkenes. O<sub>3</sub> and alkenes are the precursors of Stabilised Criegee intermediates (sCIs), whereas SO<sub>2</sub> is the precursor of SO<sub>4</sub><sup>2-(p)</sup>.

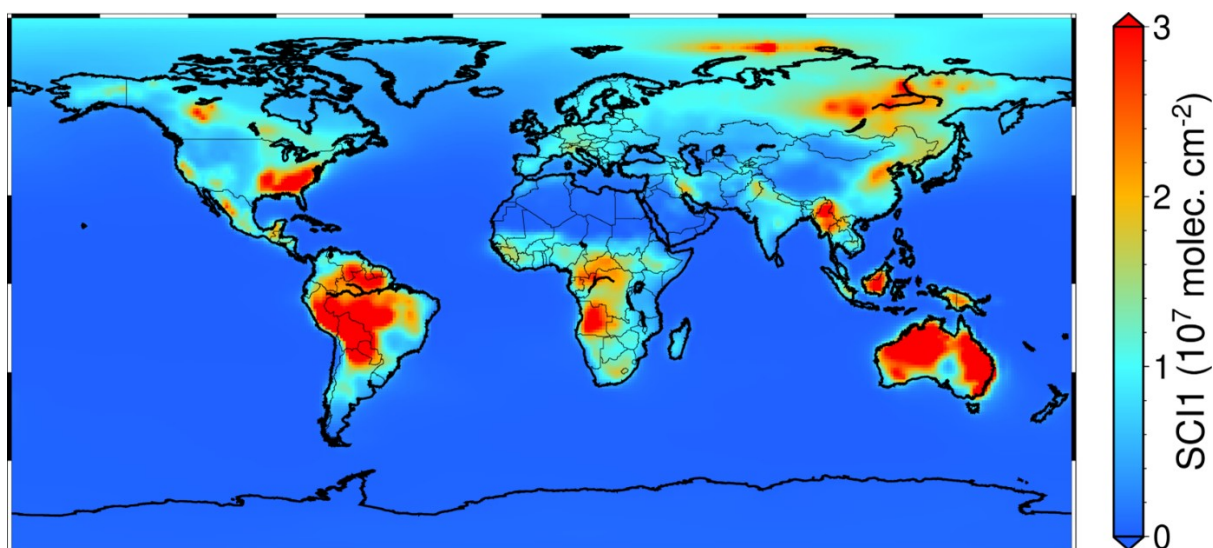

Figure S3: Annual mean column density of SCI1 derived from ozonolysis of alkenes emitted by both anthropogenic and natural sources.

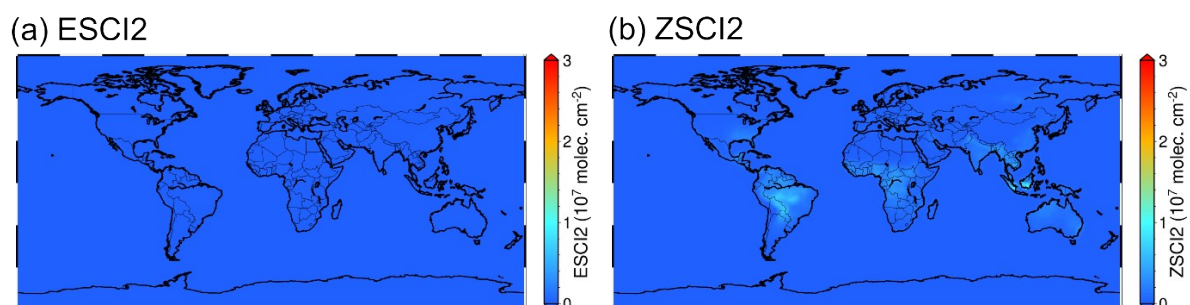

Figure S4: Annual mean column densities of ESCI2 and ZSCI2 derived from the ozonolysis of alkenes emitted by both anthropogenic and natural sources, respectively.

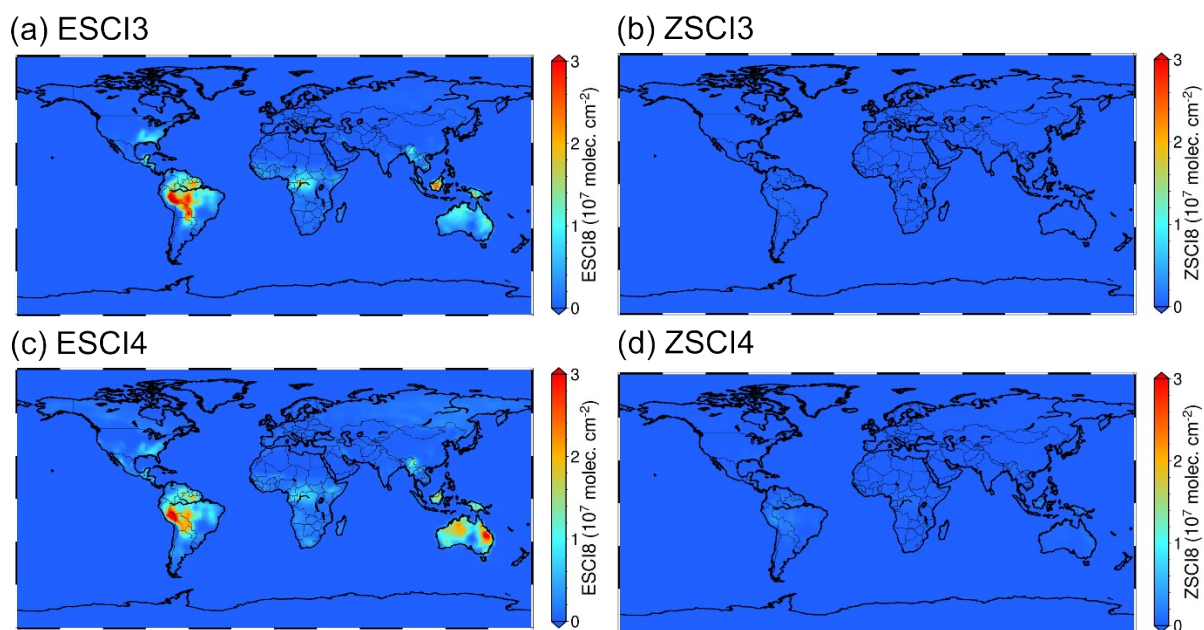

Figure S5: Annual mean column densities of *E*- and *Z*-isomers of Stabilised Criegee intermediates (sCIs) derived from isoprene ozonolysis.

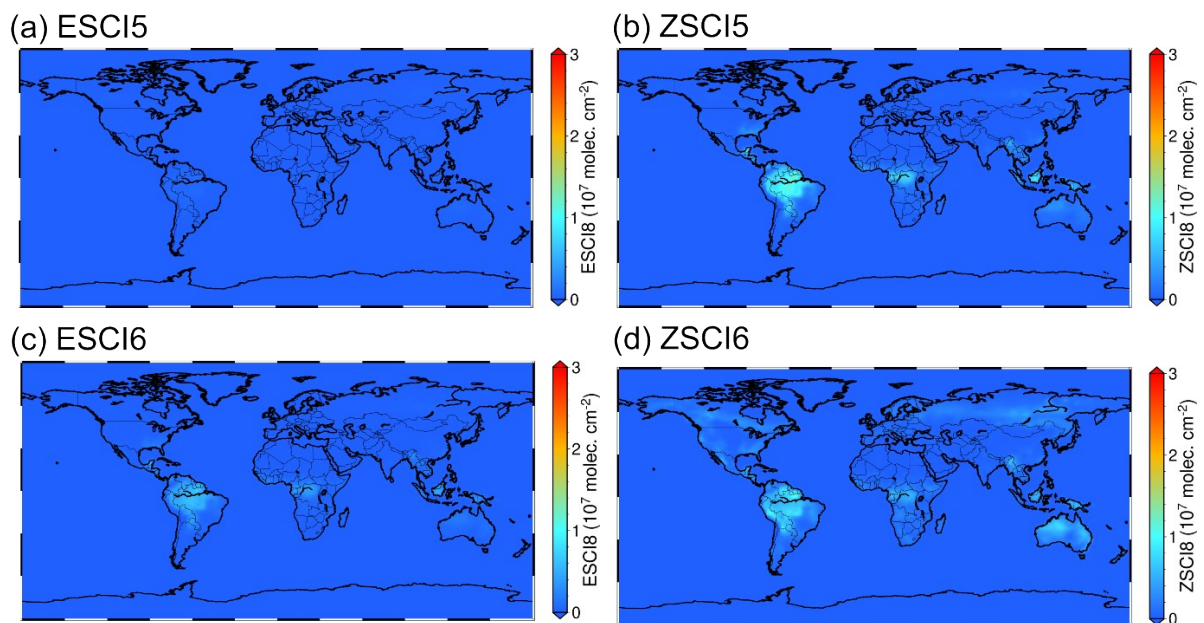

Figure S6: Annual mean column densities of *E*- and *Z*-isomers of Stabilised Criegee intermediates (sCIs) derived from the ozonolysis of monoterpenes.



(a) ESCI7

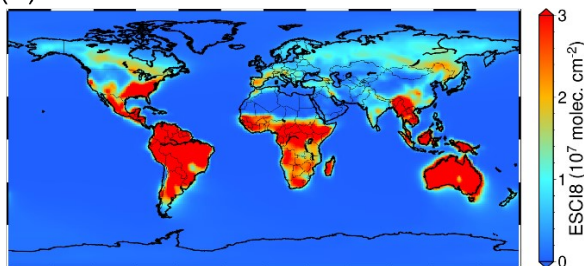

(b) ZSCI7

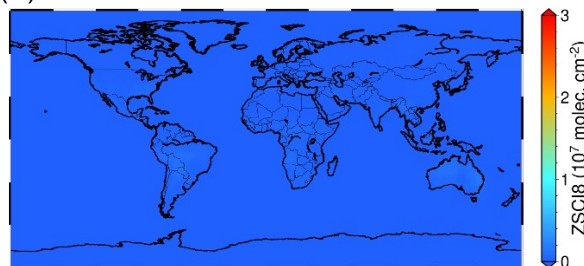

Figure S7: Annual mean column densities of *E*- and *Z*-isomers of Stabilised Criegee intermediates (sCIs) derived from the ozonolysis of methyl vinyl ketone.

(a) ESCI8

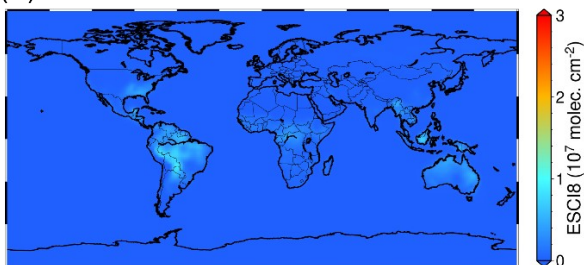

(b) ZSCI8

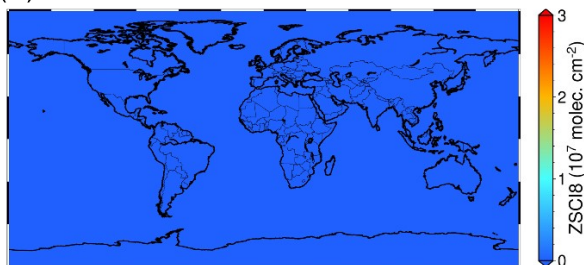

Figure S8: Annual mean column densities of *E*- and *Z*-isomers of Stabilised Criegee intermediates (sCIs) derived from the ozonolysis of methacrolein.

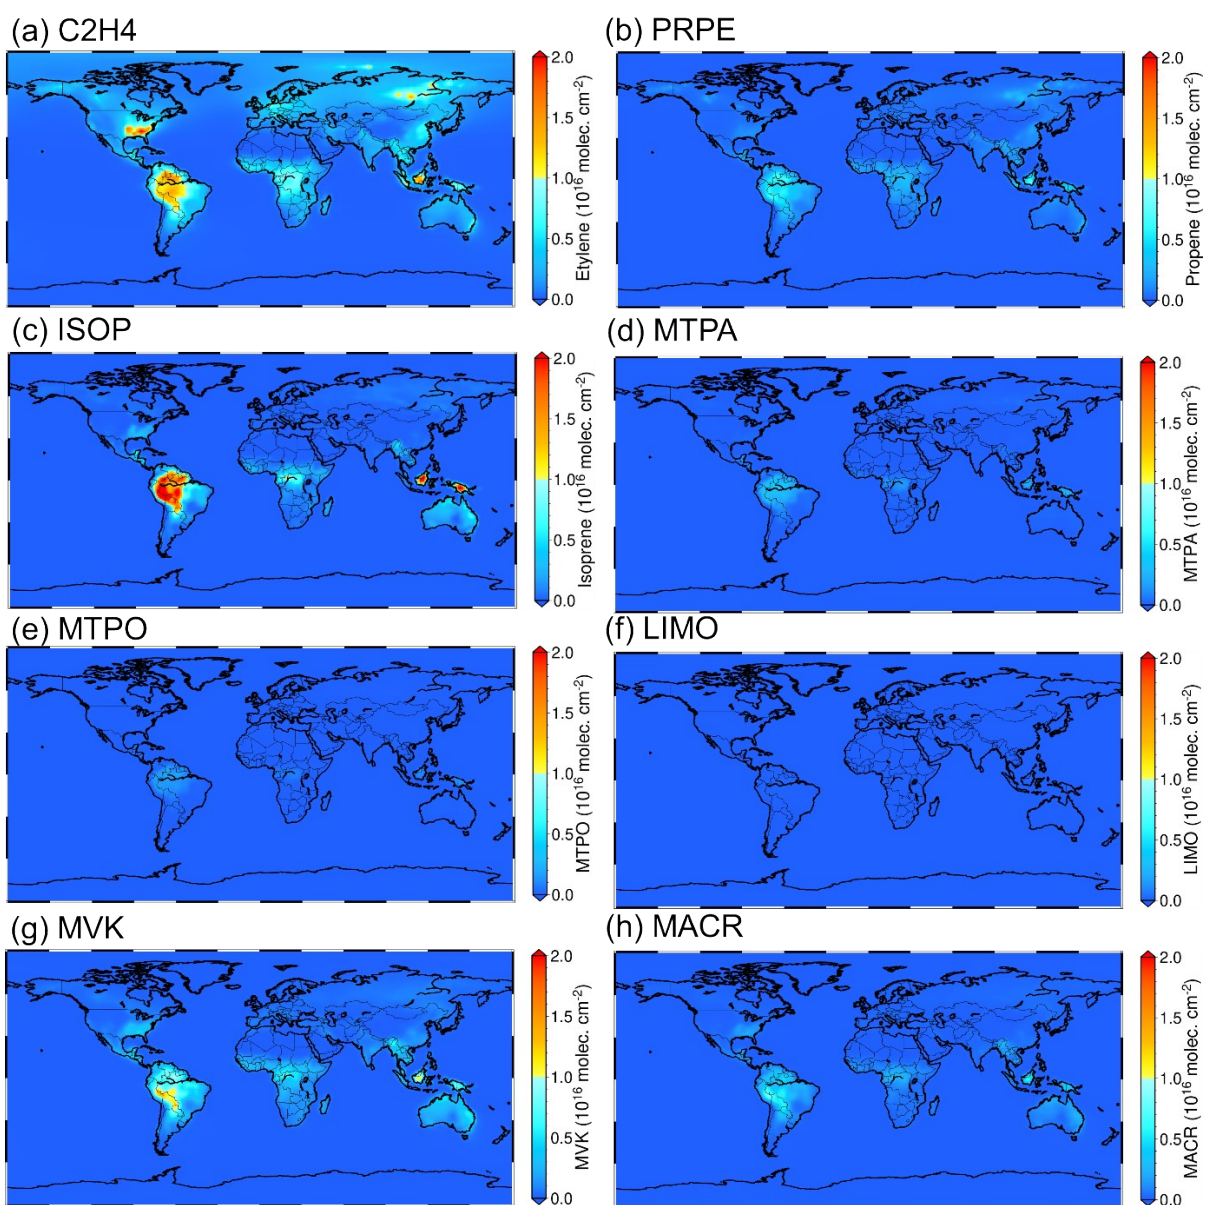

Figure S9: Annual mean column density of alkenes: (a) ethylene, (b) propene, (c) isoprene, (d)  $\alpha$ -pinene, (e) monoterpenes aside from  $\alpha$ -pinene, (f) limonene, (g) methyl vinyl ketone, and (h) methacrolein.

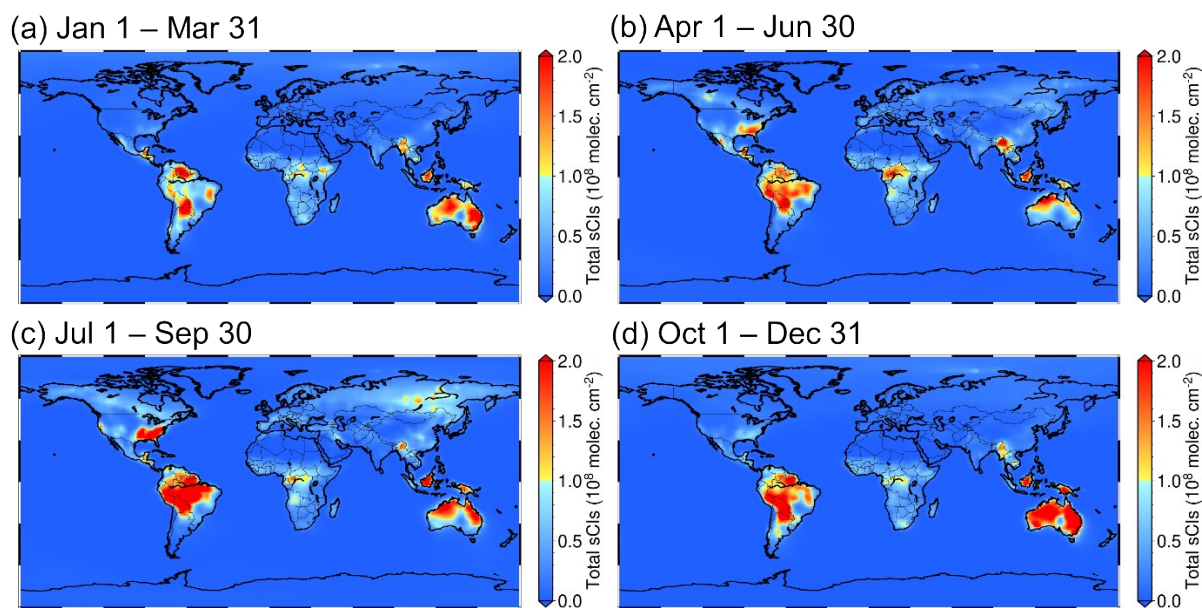

Figure S10: Seasonal trend of the total column density of sCIs in 2019: (a) January, February, and March; (b) April, May, and June; (c) July, August, and September; and (d) October, November, and December.

(a) Jan-Mar-mean sulphate

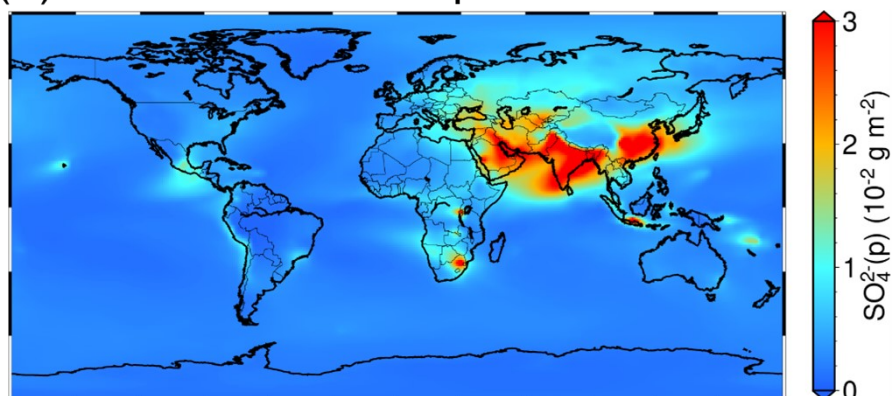

(b) Change of Jan-Mar-mean sulphate

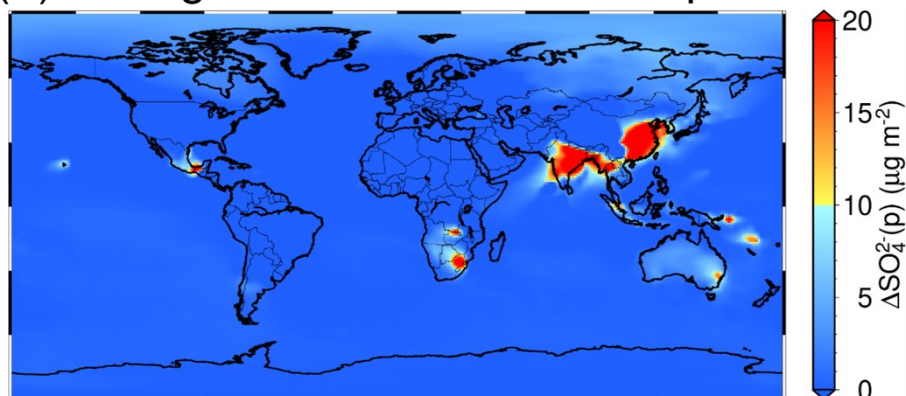

(c) Ratio of the change

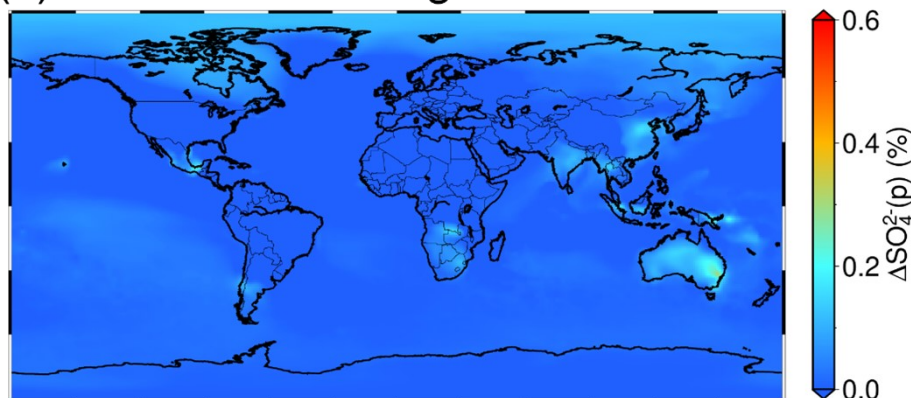

Figure S11: Mean column density from January to March for (a) sulphate ( $\text{g m}^{-2}$ ), (b) the change in column density of sulphate before and after the introduction of Criegee chemistry ( $\text{mg m}^{-2}$ ), and (c) the rate of change of sulphate before and after the introduction of Criegee chemistry (%). Note that the colour range for (c) is set to 0.0–0.6 %, which differs from the colour range of Fig. 4(c) in the main manuscript (0.0–0.4%) for improved readability.



(a) Apr-Jun-mean sulphate

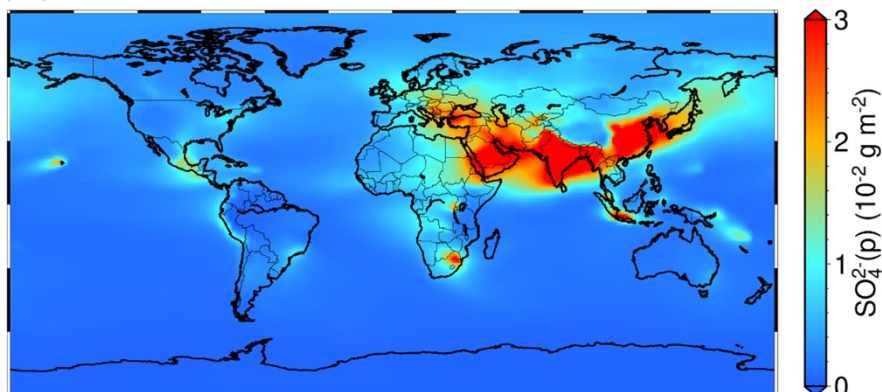

(b) Change of Apr-Jun-mean sulphate

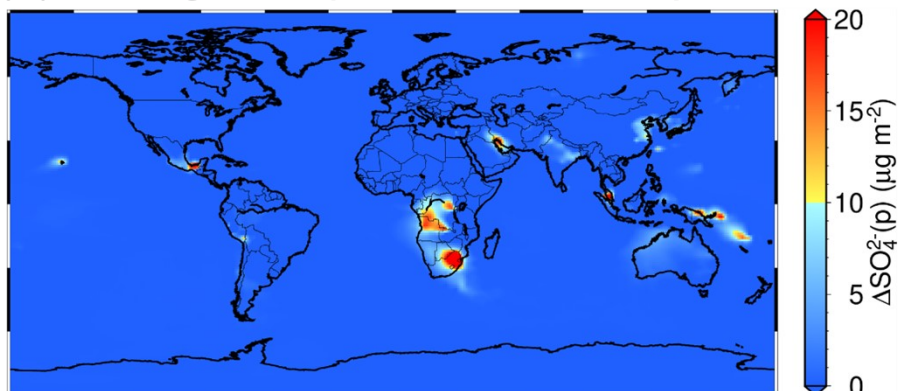

(c) Ratio of the change

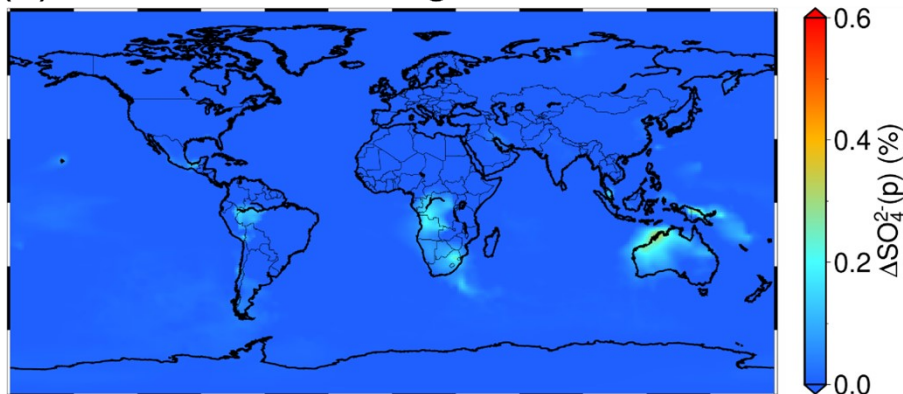

Figure S12: Mean column density from April to June for (a) sulphate ( $\text{g m}^{-2}$ ), (b) the change in column density of sulphate before and after the introduction of Criegee chemistry ( $\text{mg m}^{-2}$ ), and (c) the rate of change of sulphate before and after the introduction of Criegee chemistry (%). Note that the colour range for (c) is set to 0.0–0.6 % which differs from the colour range of Fig. 4(c) in the main manuscript (0.0–0.4%) for improved readability.



(a) Jul-Sep-mean sulphate

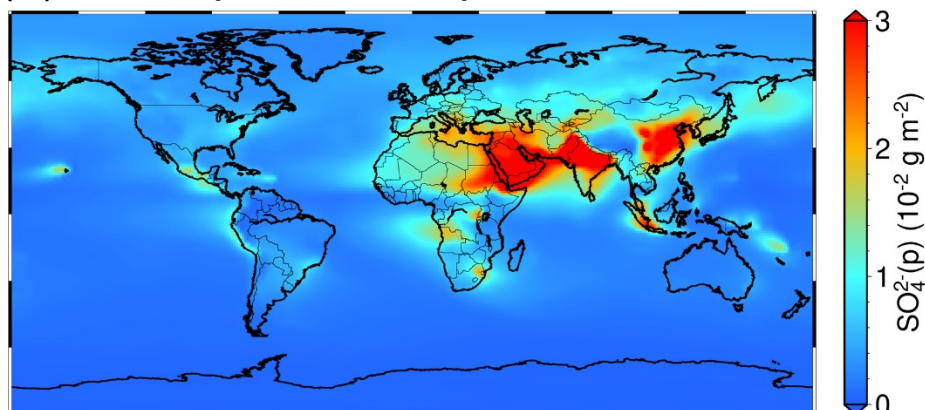

(b) Change of Jul-Sep-mean sulphate

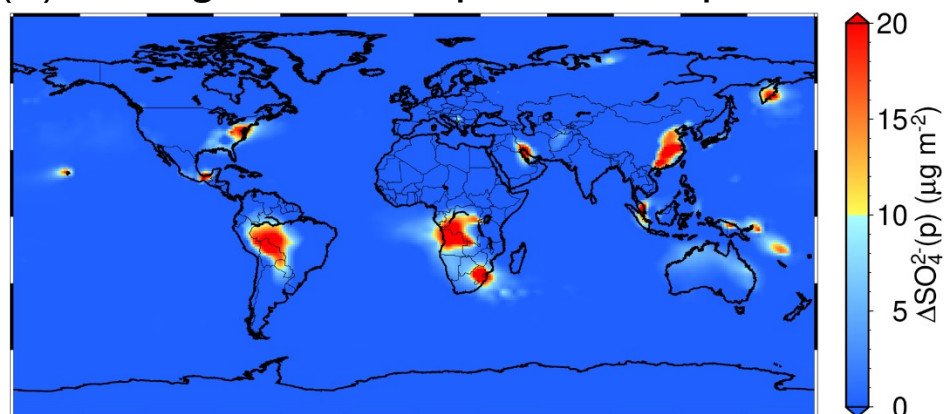

(c) Ratio of the change

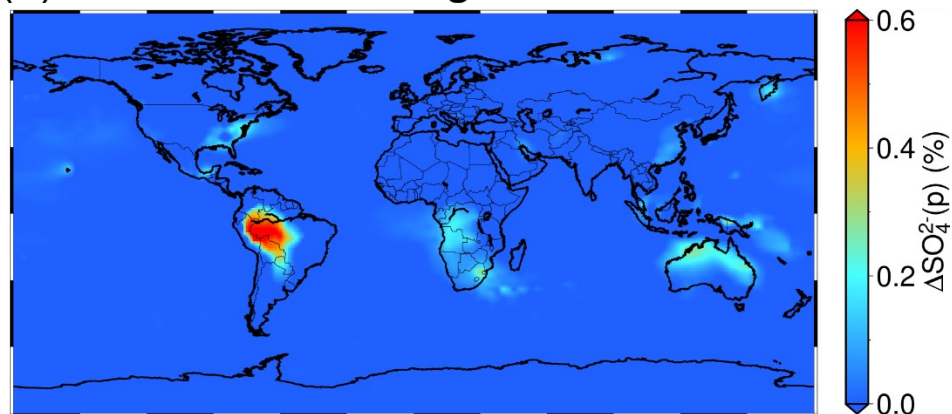

Figure S13: Mean column density from July to September for (a) sulphate ( $\text{g m}^{-2}$ ), (b) the change in column density of sulphate before and after the introduction of Criegee chemistry ( $\text{mg m}^{-2}$ ), and (c) the rate of change of sulphate before and after the introduction of Criegee chemistry (%). Note that the colour range for (c) is set to 0.0–0.6%, which differs from the colour range of Fig. 4(c) in the main manuscript (0.0–0.4%) for improved readability.

(a) Oct-Dec-mean sulphate

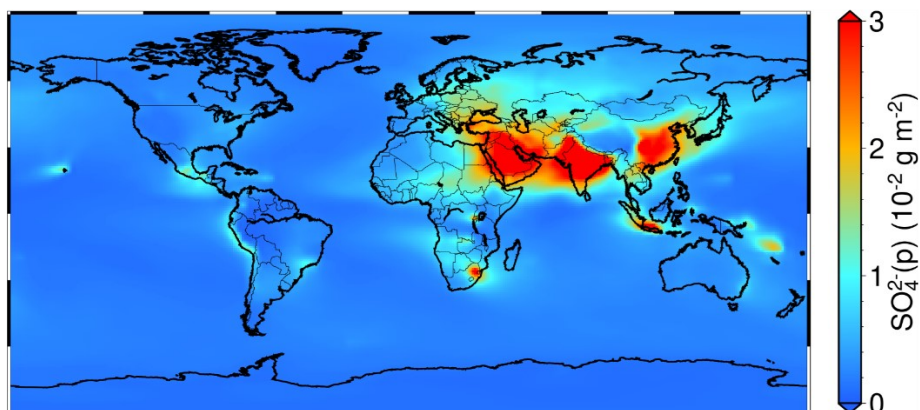

(b) Change of Oct-Dec-mean sulphate

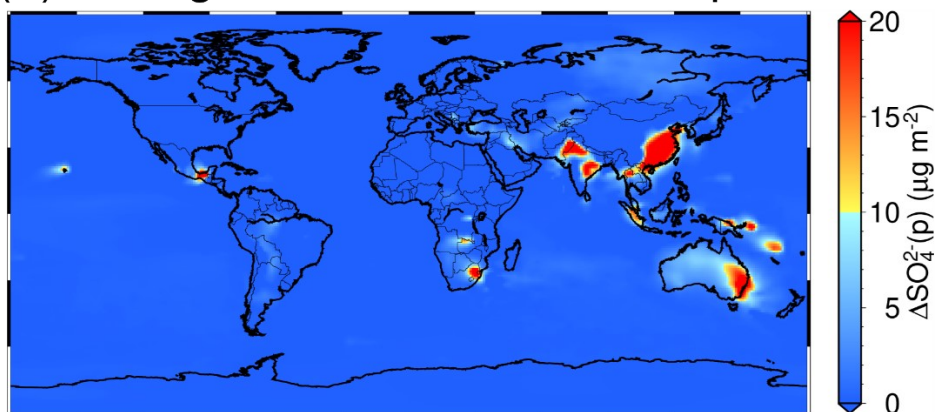

(c) Ratio of the change

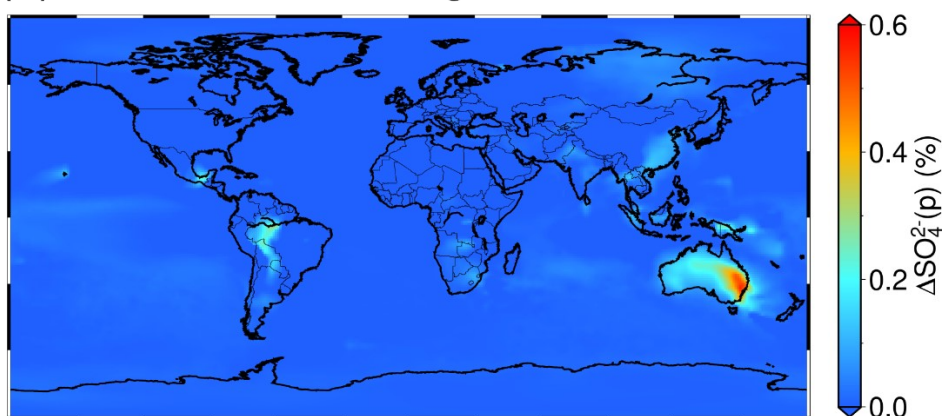

Figure S14: Mean column density from October to December for (a) sulphate ( $\text{g m}^{-2}$ ), (b) the change in column density of sulphate before and after the introduction of Criegee chemistry ( $\text{mg m}^{-2}$ ), and (c) the rate of change of sulphate before and after the introduction of Criegee chemistry (%). Note that the colour range for (c) is set to 0.0–0.6%, which differs from the colour range of Fig. 4(c) in the main manuscript (0.0–0.4%) for improved readability.
